# Supplementary material for: Dense Water Formation in the North–Central Aegean Sea during Winter 2021–2022
Source: MDPI journal article supplement (doi:10.3390/jmse12020221), 2024-01-25
Supplement: s1 [file s1]

Archive with 1 entries (1 files):
- jmse-2807449-supplementary.pdf
